# Supplementary material for: Description of a species of Fabaeformiscandona (Ostracoda, Crustacea) from Kushiro Marsh, Hokkaido, Japan, with the nearly complete mitochondrial genomic sequence
Source: Biodivers Data J. 2015 Dec 11;(3):e7074. doi: 10.3897/BDJ.3.e7074 (PMC4698455; doi:10.3897/BDJ.3.e7074)
Supplement: Supplementary material 5 — Supplemental Table 1. [file biodiversity_data_journal-3-e7074-s005.xlsx]

## Sheet: Sheet1
Name	sequence (5' - 3')	Note
LCO1490	GGT CAA CAA ATC ATA AAG ATA TTG G	Folmer et al. 1994
HCO2198	TAA ACT TCA GGG TGA CCA AAA AAT CA
12Sa	AAG AGC GAC GGG CGA TGT G	Modified from Palumbi 1996
12Sb	AAA CTA GGA TTA GAT ACC G
Fab_MｔF_COIF	TCT ATA ACA CAA TTG TTA CTG CCC ATG CTT	Designed in present study. Used for Long fragments amplification.
Fab_MｔF_COIR	TAT TTC TTG AAA GGG GAG GGT AAA CAG TTC
Fab_MｔF_12SF	CCC TCA ATA TTA ACT GCA TCT TGA CTT GAA
Fab_MｔF_12SR	AAA ATA AAT TTG TTG TTT TTG GCG GTT TTT
Fab_COIF2	AAC CCC TCA CTT CTA TGA TCT TTA GGT T	Designed in present study. Primers were for cycle secuencing
Fab_CRF	CGA ACT ACT TAT ATT CAA AGA AAA ACT TCA AAC
Fab_ND2R	GGG GAG AGA CCT TAT GAC TAA TAG AGC TG
Fab_12_16SR	CGT TTA TTA GGA TAT TTT TTT AGG GGT TAT G
Fab_COIIF	TCT CCC GCT ATA ACA ATT AAA ACT ATT GG
Fab_16SR	TAA GCA TAA ATA ATA AAA GTA AGT CTG TTC GAC
Fab_ND2TR	AGA TGA GGC AGA GAT TGA AAA AAT TG
Fab_CRｍF	TTT AGG GAA AAT TAT AAA TAA AAT AAT ATA TGA TCC
Fab_ATP6F	ATT GGT TAT ATT TTT AAT TTT TCC CTC ATA CTG
Fab_ND1R	TTT TGT GTA TTT TAG TTT ACA TTA TAG ATT GG
Fab_COIIIF	ACA ATT GAG ATT GGC ATA ACA TGA CC
Fab_COBR	GAA TAA TAA TTG AGG CAA CTA GTG CAA TAA C
Fab_ND3F	ATT TTT ATT ATT ACC CTT ATT ATT GGT CTT TTG C
Fab_ND6R	GCA AAG AAC ATA GAG AGT TTC AGA AGT TAT TC
Fab_tRNAF	AAG ATT AAC TAA AAG CCC GGA CAT TAA CC
Fab_ND4R	ATT TAC TAA TAT TTC TAT CGT TGA GTT TAA TGG
Fab_ND5F	TAA TAT TCA ACC CAT TGC AAT CAA AAT C
Fab_ND4mR	GGT ATT ATT TCT TCT GGT TTA TTT TAT TTG G
Fab_ND5R	TGG GGC TGG GAT AAT TAC ATG C	Designed in present study. Primers were for verification of the mitochondrial sequencies.
Fab_ND4mF	GTC TTC CGC TCC CTC TTC GAT
Fab_ND4F	AAA TCT ATC AAC TGC CCA AAC TCA
Fab_ND6F	GTC CTT TCT TTA ATA ATG CCT TCG
18S-F1	TAC CTG GTT GAT CCT GCC AG	Yamaguchi and Endo (2003)
18S-R6	TYT CTC RKG CTB CCT CTC C
18S-F2	CCT GAG AAA CGG CTR CCA CAT
18S-R7	GYY ARA ACT AGG GCG GTA TCT G
18S-F3	GYG RTC AGA TAC CRC CST AGT T
18S-R8	ACA TCT RAG GGC ATC ACA GAC C
18S-F4	GGT CTG TGA TGC CCT YAG ATG T
18S-R9	GAT CCT TCC GCA GGT TCA CCT AC
28S-01	GAC TAC CCC CTG AAT TTA AGC AT	Kim et al. (2000)
28S_05R	TCC CTC ACG GTA CTT GTT CA	Present study
28SR-01	GAC TCC TTG GTC CGT GTT TCA AG	Kim et al. (2000)
28sf	TGG GAC CCG AAA GAT GGT G	Luan et al. (2005)
28S_15R	CGA TTA GTC TTT CGC CCC TA	Present study
28S_16F	CAT CCG GTA AAG CGA ATG AT	Present study
28Ssr	ACA CAC TCC TTA GCG GA	Luan et al. (2005)
28S_2KF	TTG GAA TCC GCT AAG GAG TG	Present study
28S_25F	CTT ATT CCG GAA CCT GGA TG	Present study
28S_3KR	CCA ATC CTT TTC CCG AAG TT	Present study
28S_3KF	AGG TGA ACA GCC TCT AGT CG	Present study
28v-5'	AAG GTA GCC AAA TGC CTC ATC	Palumbi (1996)
28S_42F	GAG TTT GAC TGG GGC GGT A	Present study
28jj-3'	AGT AGG GTA AAA CTA ACC T	Palumbi (1996)
Mallatt_R	ACT TTC AAT AGA TCG CAG	Mallatt & Sullivan (1998)
